# Supplementary material for: Human lateral occipital complex is invariant for position and size transformations at the single-neuron level
Source: Research Square preprint supplement (doi:10.21203/rs.3.rs-8222241/v1), 2025-12-08
Supplement: Supplementary file 1 [file eed011b5f19397c00e0e2e77.docx]

**Supplementary figures**

|  | x-axis  starting point | y-axis  starting point | x-axis endpoint | y-axis endpoint |  |  |
| --- | --- | --- | --- | --- | --- | --- |
| Position 1 | 597.13 | 658.77 | 596.15 | 659.65 | -0.98 | 0.88 |
| Position 2 | 596.88 | 657.33 | 596.20 | 659.04 | -0.68 | 1.71 |
| P-value |  |  |  |  | 0.229 | 0.123 |

**Supplementary Table S1.** Eye deviation ( in pixels from moment of stimulus onset till offset for array 1. P-values compare net pixel displacement in x- and y-axis using independent samples t-test between both positions. Positions reference to the positions as displayed in figure 1B.

|  | x-axis  starting point | y-axis  starting  point | x-axis endpoint | y-axis endpoint |  |  |
| --- | --- | --- | --- | --- | --- | --- |
| Pos. 1 | 648.92 | 517.71 | 648.86 | 517.30 | -0.06 | -0.41 |
| Pos. 2 | 648.64 | 518.39 | 648.99 | 520.07 | 0.35 | 1.68 |
| Pos. 3 | 645.94 | 529.83 | 646.57 | 529.30 | 0.63 | -0.53 |
| Pos. 4 | 649.68 | 516.48 | 650.35 | 516.57 | 0.67 | 0.09 |
| Pos. 5 | 648.97 | 515.97 | 649.41 | 517.33 | 0.45 | 1.36 |
| P-value | | | | | | |
|  | Pos.1 | Pos. 2 | Pos. 3 | Pos. 4 | Pos.5 |  |
| Pos. 1 | 1 | 0.024 | 0.922 | 0.603 | 0.068 |
| Pos. 2 | 0.537 | 1 | 0.050 | 0.067 | 0.724 |
| Pos. 3 | 0.417 | 0.725 | 1 | 0.600 | 0.115 |
| Pos. 4 | 0.267 | 0.604 | 0.958 | 1 | 0.164 |
| Pos. 5 | 0.470 | 0.880 | 0.835 | 0.738 | 1 |

**Supplementary Table S2.** Eye deviation ( in pixels from moment of stimulus onset till offset for array 2. P-values compare net pixel displacement in x-axis (orange) and y-axis (green) using independent samples t-test between both positions. Positions reference to the positions as displayed in figure 1B.

**
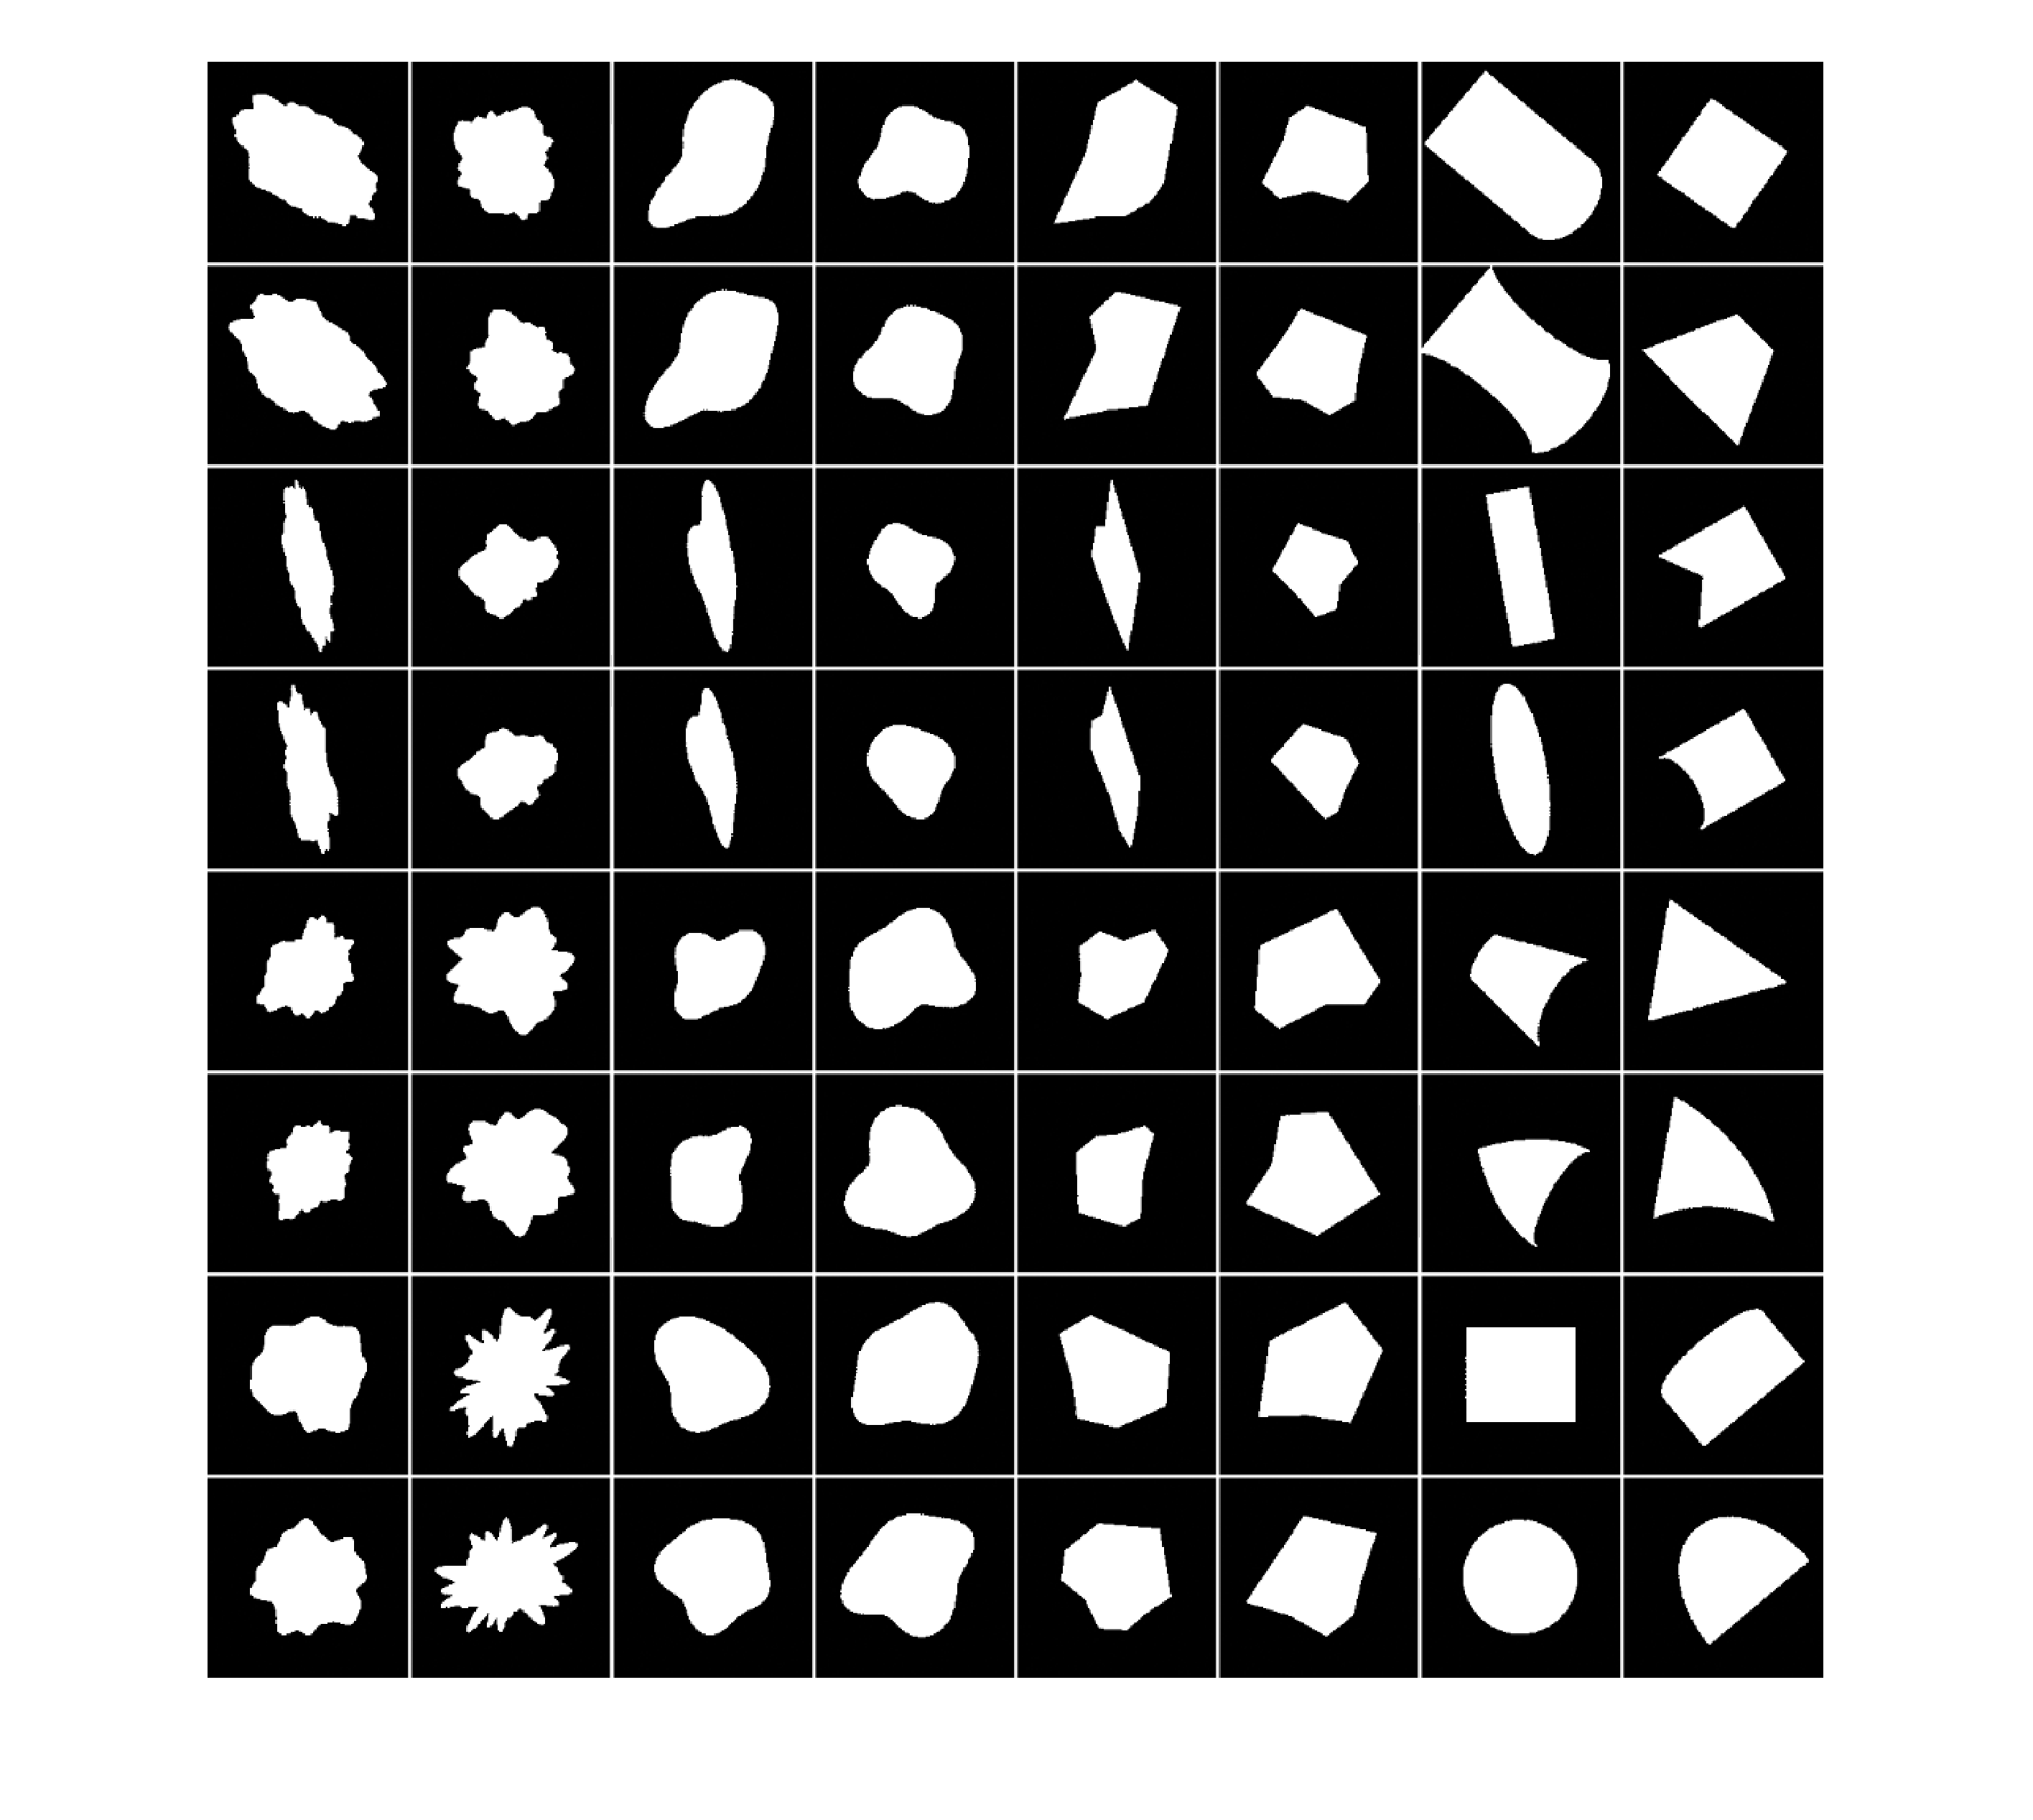
**

**Supplementary Figure S1.** All 64 simple shapes that were presented in 2 positions within the receptive field in array 1.

**
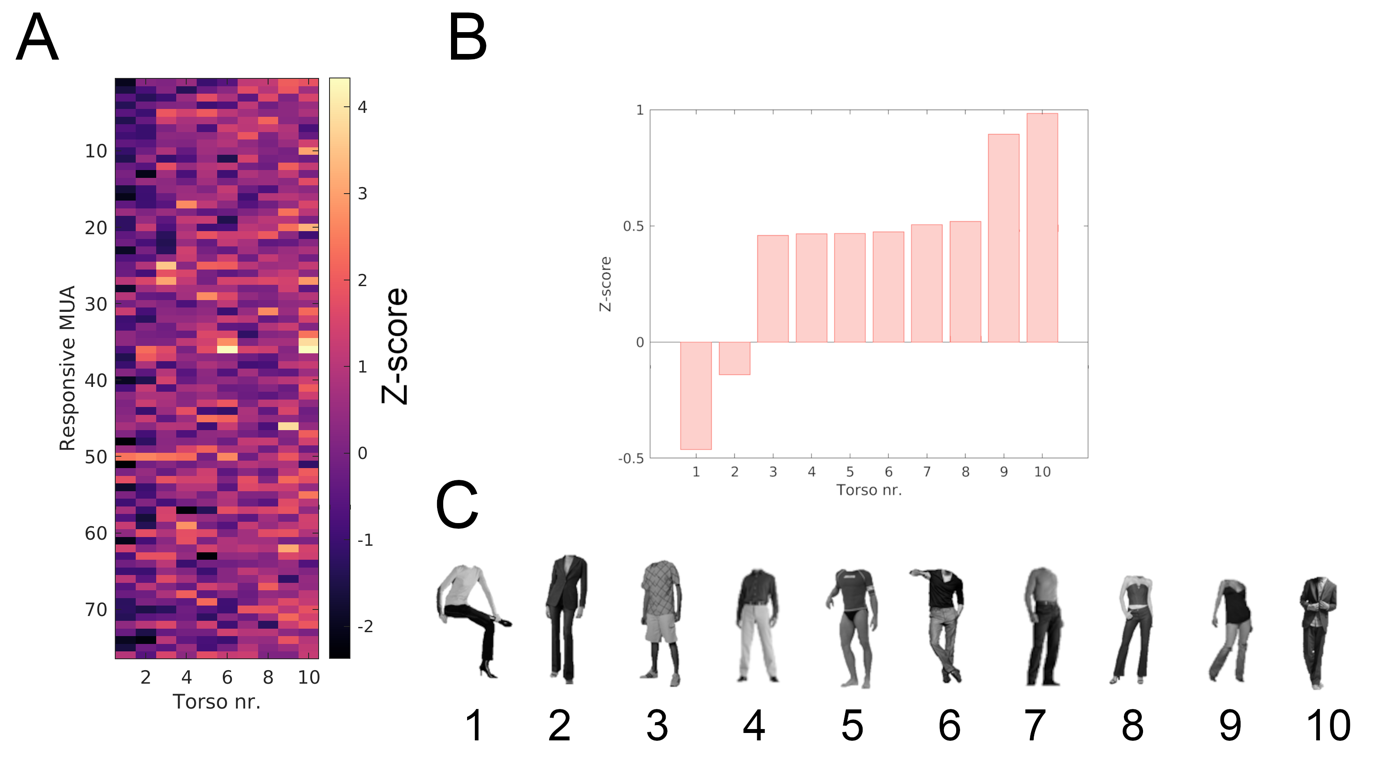
**

**Supplementary Figure S2. Selection of the preferred torso for receptive field mapping. A)** Overview of the average Z-normalized responses within the response window (250 - 400 ms) for 76 visually responsive multi-units from array 2 across 10 different torso images. The torsos are arranged from left to right in ascending order of average response across all multi-units. **B)** Average Z-normalized responses for each torso across all responsive multi-units, sorted in ascending order. **C)** Visualization of the 10 torso images used. Torso 10 elicited the highest average response across all multi-units and was therefore selected for receptive field mapping.


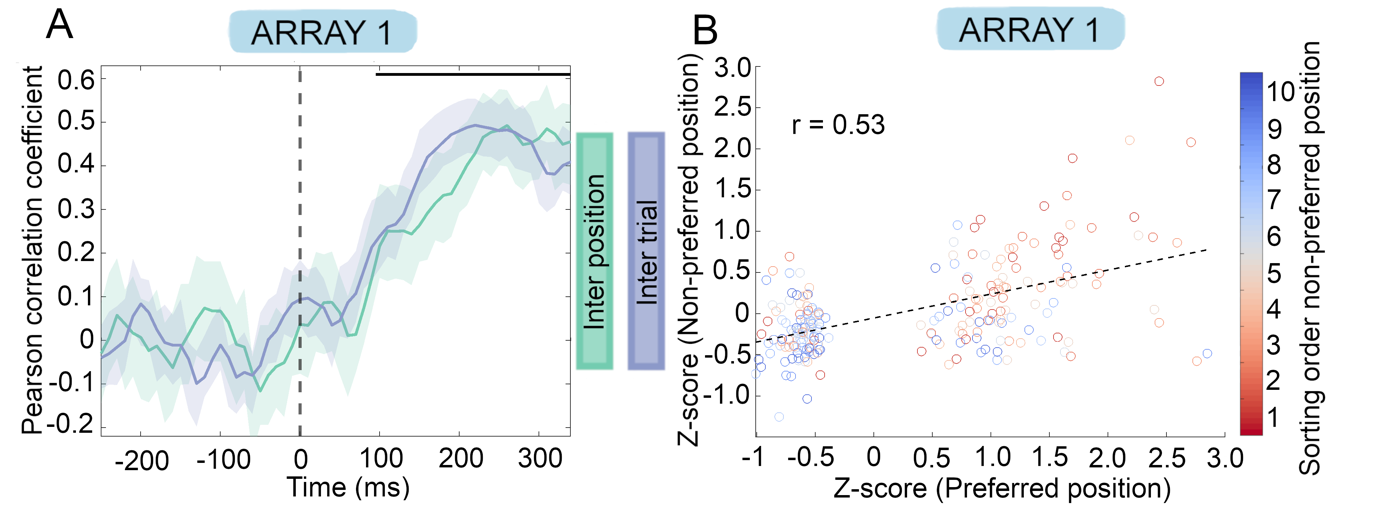


**Supplementary Figure S3. A)** Pearson correlation coefficient over time for sorted stimuli in the preferred and non-preferred locations (green line) when only the 5 best and worst stimuli are used per single-unit. The blue line represents intertrial variability, providing the theoretical maximum possible correlation for the green line. Shaded regions indicate 95% confidence intervals. Horizontal bars mark time intervals where the correlation was significantly higher than expected under random label shuffling (p < 0.001, one-sided permutation test with a minimum of three consecutive significant time points). **B)** Scatter plot illustrating the responses in the preferred location (x-axis) against the corresponding sorted responses in non-preferred locations (y-axis) at peak correlation (260–360 ms). Dotted line represents a fitted linear regression. Note that the scatter plot doesn’t show a continuous cloud because only the 5 best and 5 worst stimuli were used per single unit.


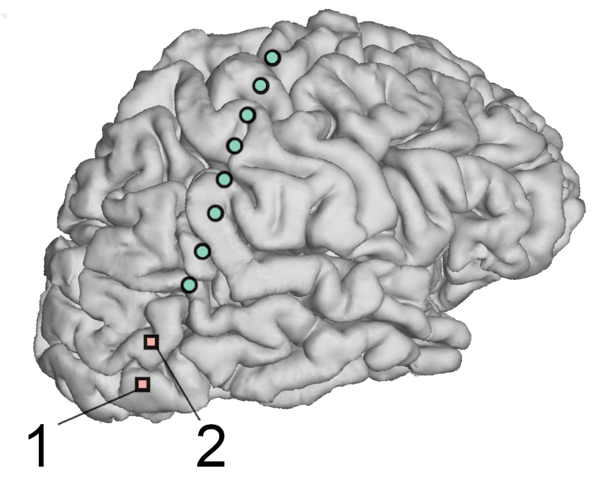


**Supplementary Figure S4.** Array locations in relationship to the implanted subdural grid (green dots) in left lateral occipital cortex.

**
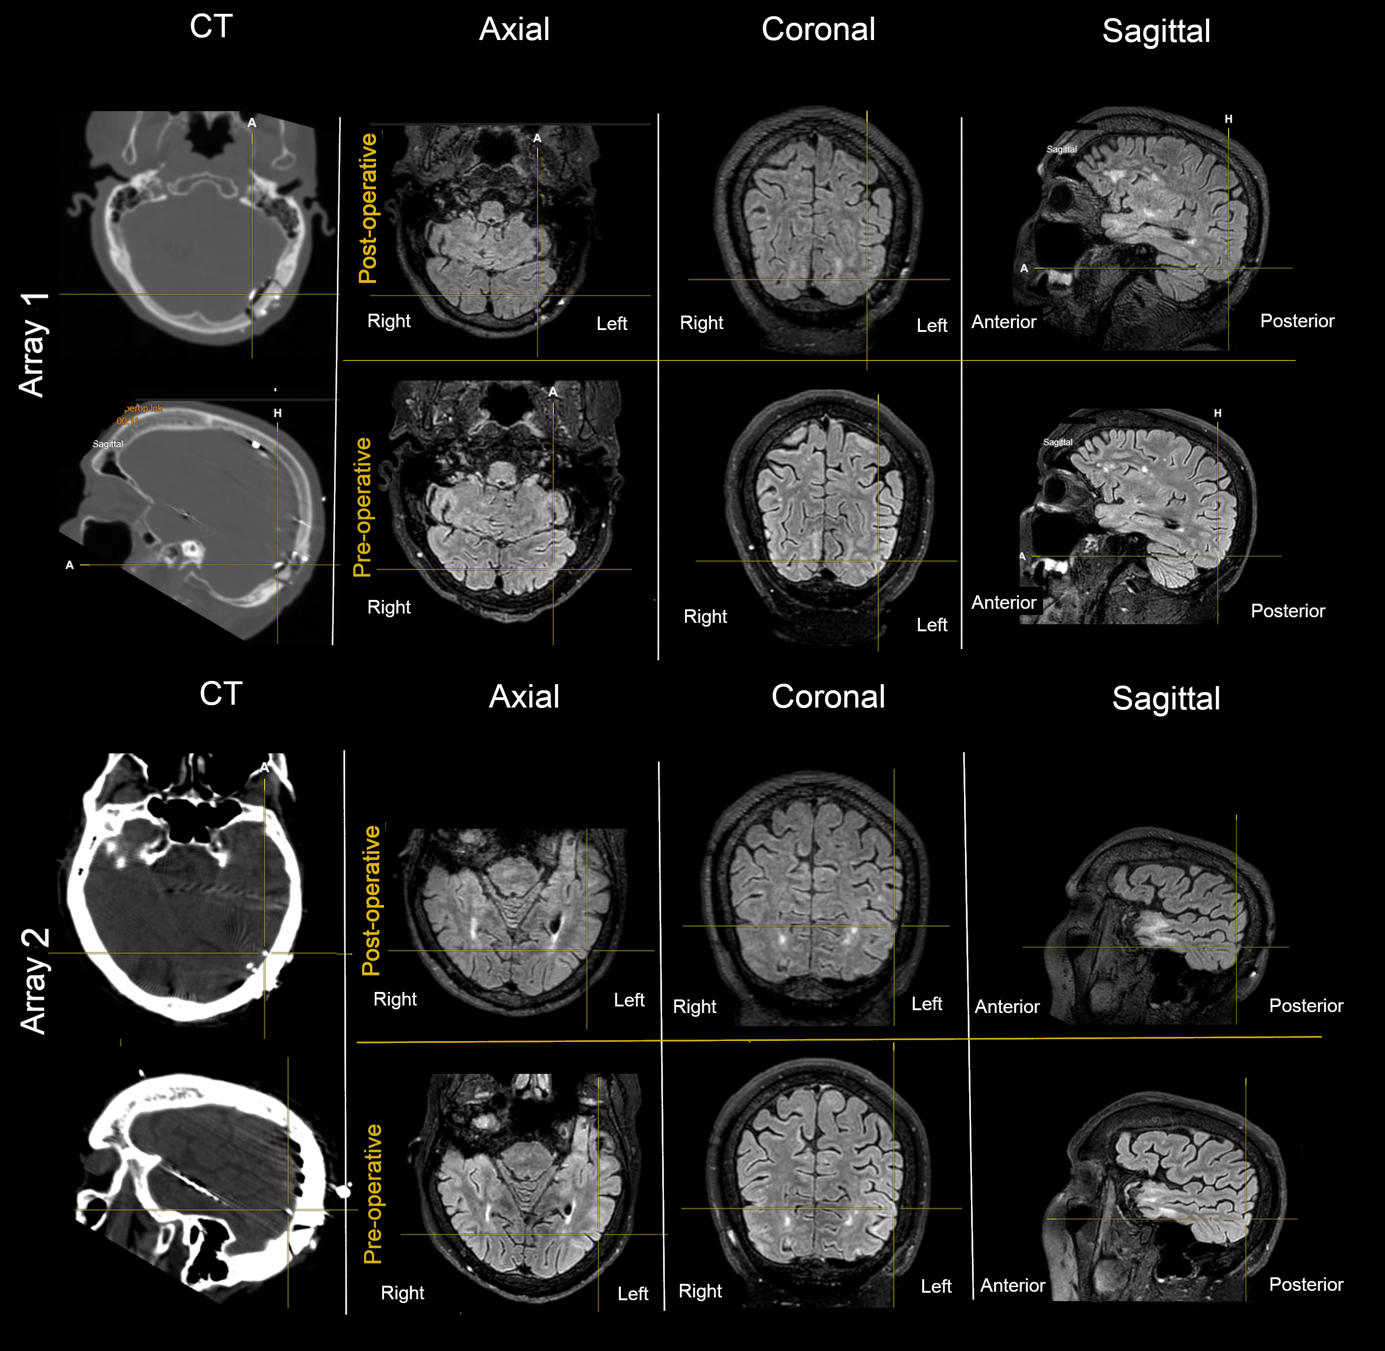
**

**Supplementary Figure S5. Array localization.** Axial, coronal, and sagittal slices of pre-implantation and post-explantation MRI (FLAIR) scans are presented. Pre-implantation MRI, post-explantation MRI, and post-implantation/pre-explantation CT scans were co-registered using Brainlab Elements software. The exact location of the array was determined based on CT imaging. Notably, no lesions were visible on the post-explantation MRI in the area where the array was inserted.
